# Supplementary material
Source: HighWire-hosted journal article supplement (https://www.cmaj.ca/highwire/filestream/59098/field_highwire_adjunct_files/0/image-sinonasal-1-at-appendix.pdf)
Supplement: image-sinonasal-1-at-appendix.pdf [file image-sinonasal-1-at-appendix.pdf]

Appendix 1: A microphotograph of a biopsy sample of the sinonasal mucosa of a 63-year-old woman showing fibrinoid vasculitis (green arrows) and histiocytic proliferation surrounding the vessels (red arrows), with inflammatory cell infiltration in the vascular wall (\*). These findings are compatible with a diagnosis of Wegener granulomatosis. Hematoxylin and eosin stain (original magnification x 400).

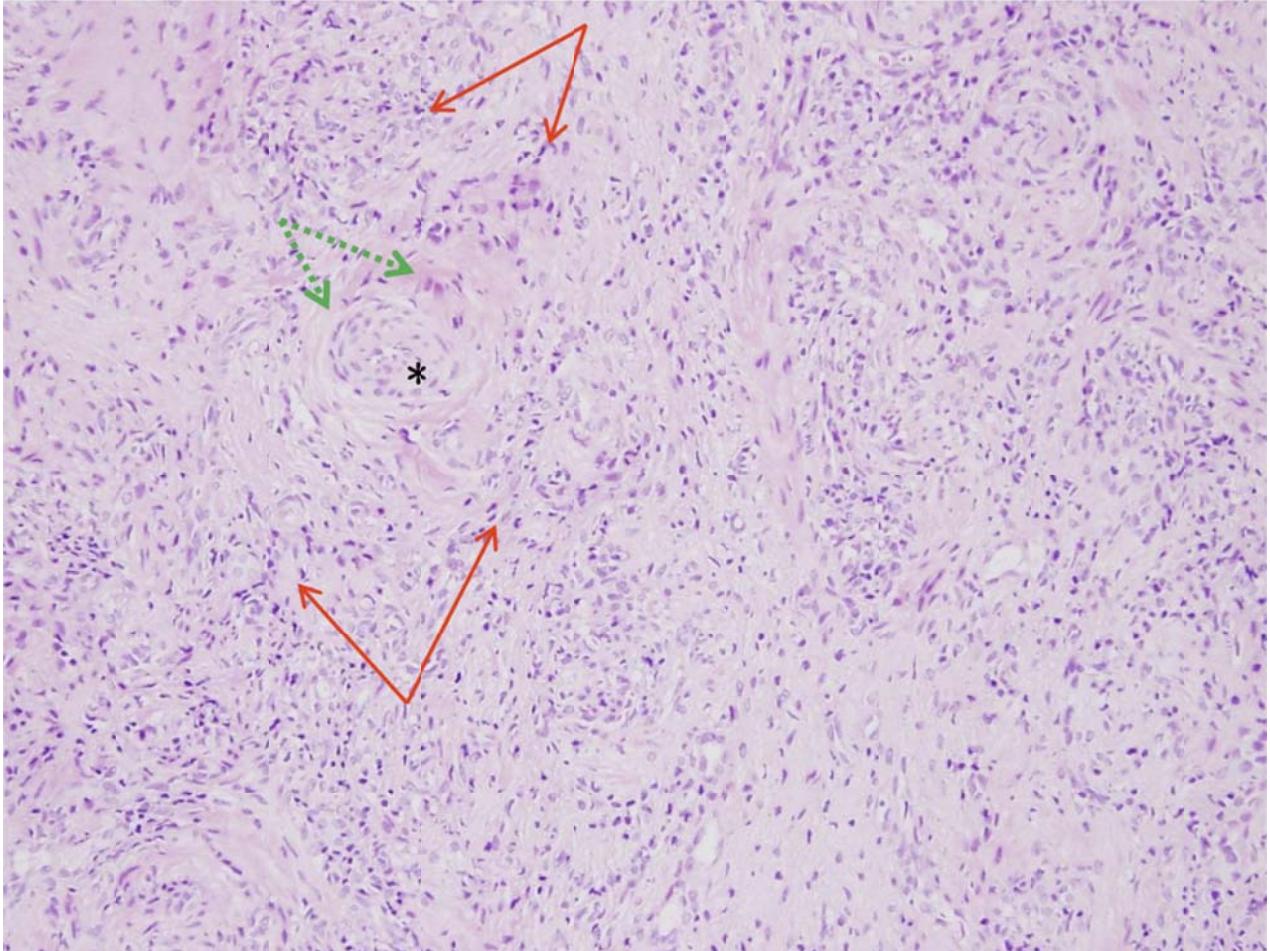

Appendix to: Kuo C.-Y., Wang C.-H. Wegener granulomatosis: changes in the sinonasal mucosa. *CMAJ* 2014. DOI: 10.1503/cmaj.131881.
